# Supplementary material for: Doped crystalline thin-film deep-blue organic light-emitting diodes
Source: Royal Society of Chemistry journal article supplement (doi:10.1039/d0tc05934j), 2021-01-01
Supplement: d0tc05934j1.pdf [file d0tc05934j1.pdf]

1 Supplementary Information

2

3

4 **Doped crystalline thin-film deep-blue organic light-emitting diodes**

5 Jianhui Xin<sup>a,b</sup>, Peifu Sun<sup>a,b</sup>, Feng Zhu<sup>a,b,\*</sup>, Yue Wang<sup>c</sup> and Donghang Yan<sup>a,b</sup>

6 <sup>a</sup>State Key Laboratory of Polymer Physics and Chemistry, Changchun Institute of Applied

7 Chemistry, Chinese Academy of Sciences, Changchun 130022, China.

8 <sup>b</sup>School of Applied Chemistry and Engineering, University of Science and Technology of

9 China, Hefei 230026, China.

10 <sup>c</sup>State Key Laboratory of Supramolecular Structure and Materials, Jilin University, Changchun

11 130012, China.

12 \*Corresponding author. Email: [zhufeng@ciac.ac.cn](mailto:zhufeng@ciac.ac.cn)

13 **Contents:**

14 1. Time-of-flight (TOF) mobility

15 2. EL performance of non-doped C-OLED

16 3. Photophysical characterization of 2FPPIcZ based on different phases

17 4. Photoluminescence quantum yields (PLQYs) results

18 5. EL performance of doped C-OLEDs with different concentrations

19 6. Summary of the non-doped and doped C-OLEDs based on 2FPPIcZ, and other high-  
20 efficiency deep-blue OLEDs with  $CIE_y \leq 0.05$

21 7. Summary of areal energy loss from Joule heat of series resistance

22 8. References

23

## 24 1. Time-of-flight (TOF) mobility

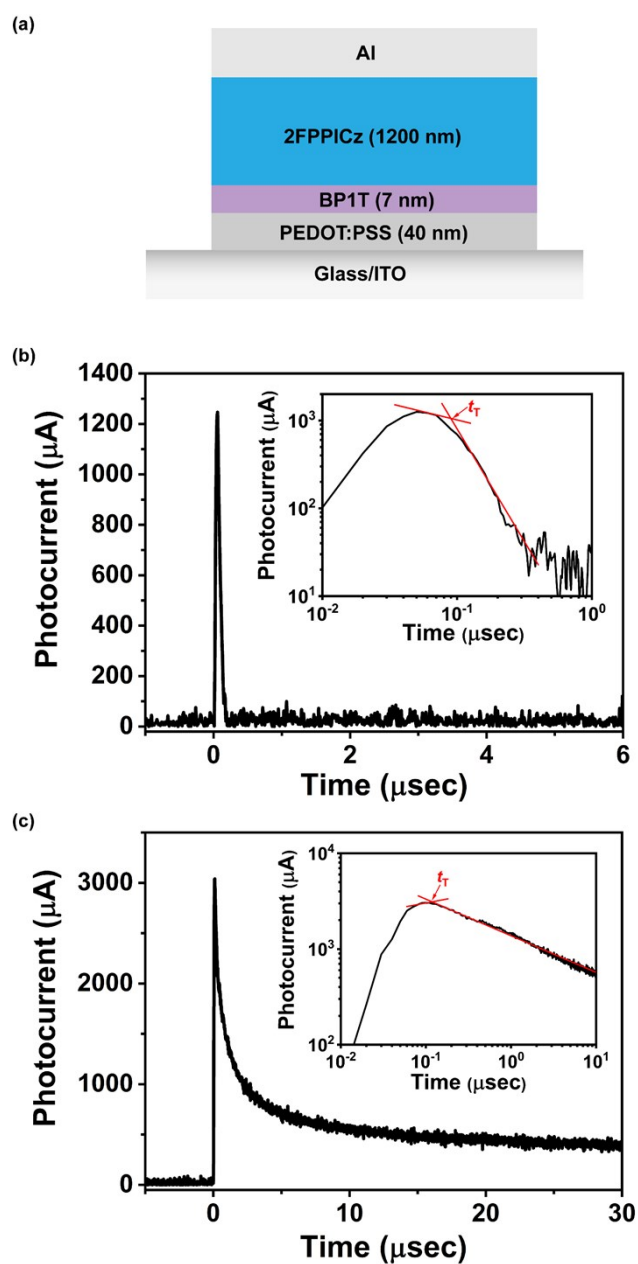

25  
26

27 **Fig. S1** Typical transient photocurrent signals for 2FPPICz WEG crystalline thin film. (a)  
28 Schematic diagram of device structure of TOF mobility measurement. (b-c) Representative  
29 TOF transients for hole at  $E = 1.0 \times 10^4 \text{ V cm}^{-1}$  (b) and electron at  $E = 9.1 \times 10^4 \text{ V cm}^{-1}$  (c) at  
30 room temperature. The insets are double-logarithmic plots of the data in (b) and (c).

31

## 32 2. EL performance of non-doped C-OLED

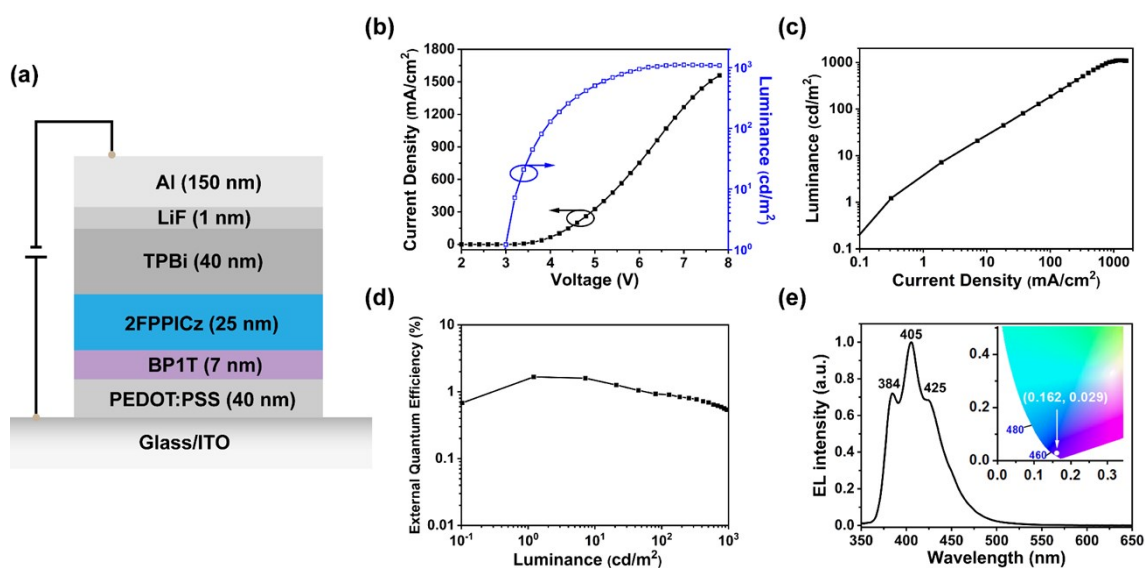

33

34 **Fig. S2** EL performance of C-OLED. (a) Device structure of C-OLED based on non-doped  
 35 2FPPICz WEG crystalline thin film. (b) Voltage dependent of current density and luminance  
 36 characteristics. (c) Luminance-Current density characteristics. (d) EQE-Luminance- curves. (e)  
 37 Normalized EL spectra at 5.0 V. The inset is CIE1931 chromaticity diagram including the  
 38 chromaticity coordinates of EL spectra from the non-doped 2FPPICz C-OLED.

39

### 40 3. Photophysical characterization of 2FPPIcZ based on different phases

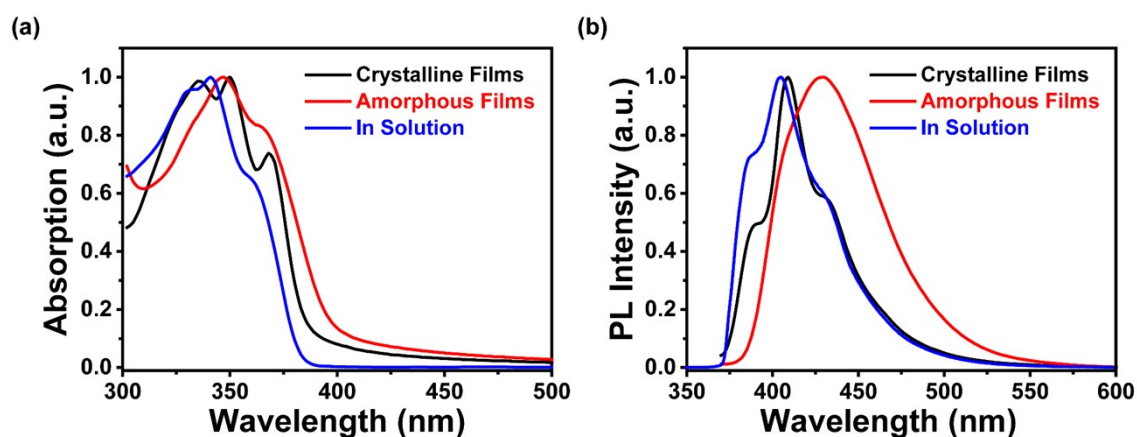

41

42 **Fig. S3** Photophysical characterization. (a-b) Normalized ultraviolet-visible (UV-vis)

43 absorption (a) and photoluminescence (PL) spectrum (b) of 2FPPIcZ based on different forms.

44 Note: The samples for the photophysical characterization of 2FPPIcZ crystalline and

45 amorphous thin films were prepared by vacuum deposition based on quartz substrates. The

46 photophysical of dispersed 2FPPIcZ form was characterized in toluene dilute solution ( $10^{-5}$  M).

47 The excitation wavelength of PL spectrum is 340 nm.

48

49 **4. Photoluminescence quantum yields (PLQYs) results**

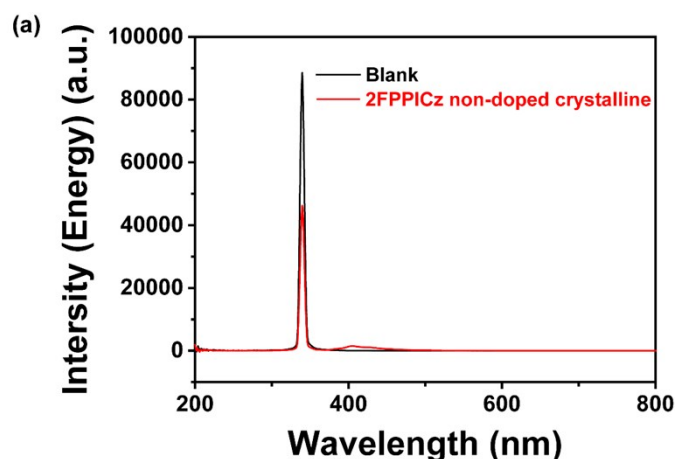

| NO:                           | Cursor1-2:<br>329.09<br>350.21 (nm) | Cursor3-4:<br>374.34<br>728.21 (nm) | Quantum Yield | Abs   | Peak Wavelength | Peak Count | Peak FWHM | Peak Wavelength | Peak Count | Peak FWHM |
|-------------------------------|-------------------------------------|-------------------------------------|---------------|-------|-----------------|------------|-----------|-----------------|------------|-----------|
| Blank                         | 211279938                           | —                                   | —             | —     | 339.65          | 88559.64   | 6.66      | 375.10          | 254.82     | 84.61     |
| 2FPPICz Non-doped crystalline | 112372944                           | 28404116                            | 0.287         | 0.468 | 339.65          | 46592.64   | 6.72      | 405.24          | 1272.71    | 49.63     |

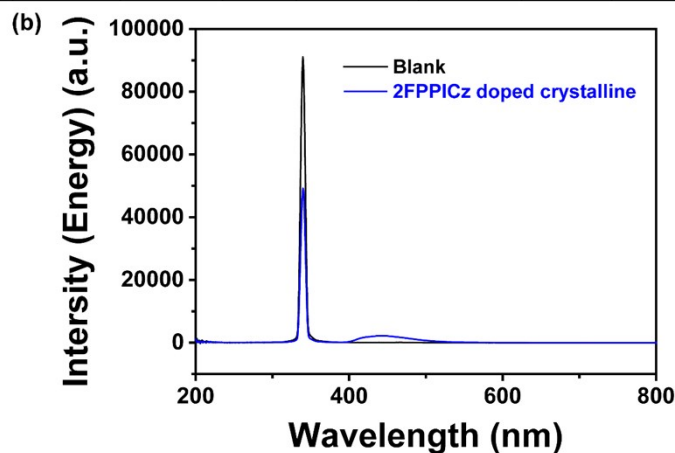

| NO:                       | Cursor1-2:<br>329.09<br>350.21 (nm) | Cursor3-4:<br>394.69<br>550.24 (nm) | Quantum Yield | Abs   | Peak Wavelength | Peak Count | Peak FWHM | Peak Wavelength | Peak Count | Peak FWHM |
|---------------------------|-------------------------------------|-------------------------------------|---------------|-------|-----------------|------------|-----------|-----------------|------------|-----------|
| Blank                     | 231520708                           | —                                   | —             | —     | 339.65          | 91064.89   | 7.17      | 397.71          | 147.56     | 115.80    |
| 2FPPICz Doped crystalline | 127964033                           | 70431997                            | 0.680         | 0.447 | 339.65          | 49240.14   | 7.34      | 442.88          | 2247.36    | 74.33     |

50  
51 **Fig. S4** Photoluminescence quantum yields (PLQYs) results. (a) PLQY of 2FPPICz non-doped  
52 crystalline thin films. (b) PLQY of 2FPPICz doped crystalline thin film.

| <b>Table S1. PLQYs of 2FPPIcZ doped and non-doped WEG crystalline thin films</b> |                  |            |
|----------------------------------------------------------------------------------|------------------|------------|
| <b>emitter</b>                                                                   | <b>PLQYs (%)</b> | <b>ref</b> |
| Non-doped 2FPPIcZ WEG crystalline thin films                                     | 29               | this work  |
| Doped 2FPPIcZ WEG crystalline thin films                                         | 68               | this work  |
| 2FPPIcZ amorphous thin films                                                     | 53               | 27         |
| 2FPPIPCz amorphous thin films                                                    | 79               | 27         |

53

54

55 **5. EL performance of doped C-OLEDs with different concentrations**

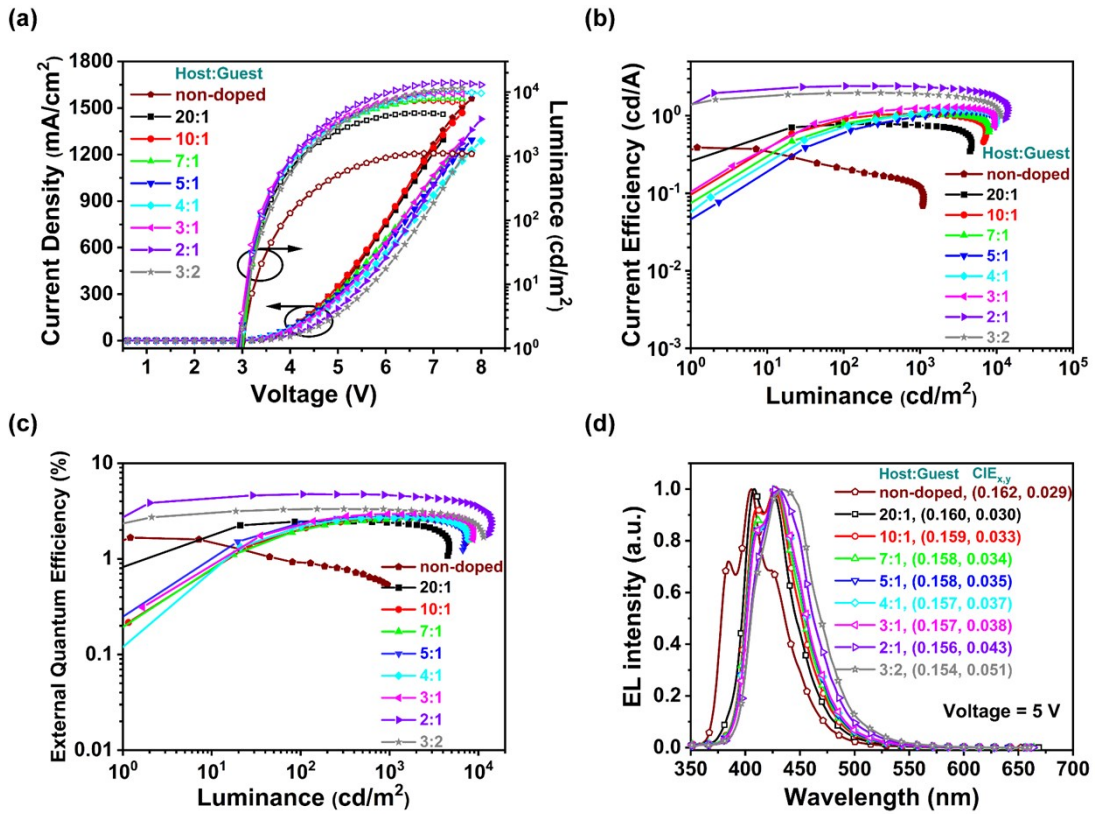

56

57 **Fig. S5** EL performance of doped C-OLEDs with different concentrations. (a) Voltage-  
 58 dependent current density and luminance characteristics. (b) Current Efficiency-Luminance  
 59 characteristics. (c) EQE-Luminance curves. (d) Normalized EL spectra at 5.0 V of doped C-  
 60 OLEDs based on various doping concentrations.

61

62 **6. Summary of the non-doped and doped C-OLEDs based on 2FPPIcZ, and other**  
63 **high-efficiency deep-blue OLEDs with CIE<sub>y</sub> ≤ 0.05**

**Table S2. Summary of the non-doped and doped C-OLEDs based on 2FPPIcZ, and other high-efficiency deep-blue OLEDs with CIE<sub>y</sub> ≤ 0.05 (Ref.<sup>1-29</sup>)**

| Emitters <sup>a</sup>                                         | Voltage (V) <sup>b</sup> | EQE (%) <sup>c</sup> | CE (cd/A) <sup>c</sup> | PE (lm/W) <sup>c</sup> | λ <sub>max</sub> (nm) <sup>d</sup> | L <sub>max</sub> (cd/m <sup>2</sup> ) <sup>e</sup> | CIE                         | ref       |
|---------------------------------------------------------------|--------------------------|----------------------|------------------------|------------------------|------------------------------------|----------------------------------------------------|-----------------------------|-----------|
| 2FPPIcZ (N)                                                   | 3.0/6.2/3.2              | 1.6/0.5              | 0.38/0.12              | 0.41/0.06              | 405                                | 1100 (6.8)                                         | (0.162, 0.029) <sup>f</sup> | this work |
| 2FPPIcZ (20:1) (D)                                            | 3.0/4.3/1.3              | 2.5/2.4              | 0.78/0.75              | 0.71/0.53              | 407                                | 4700 (6.8)                                         | (0.160, 0.030) <sup>f</sup> | this work |
| 2FPPIcZ (7:1) (D)                                             | 3.0/4.1/1.1              | 2.7/2.6              | 1.03/1.02              | 0.82/0.78              | 427                                | 8007 (7.2)                                         | (0.158, 0.034) <sup>f</sup> | this work |
| 2FPPIcZ (2:1) (D)                                             | 3.0/4.1/1.1              | 4.7/4.5              | 2.42/2.35              | 2.30/1.78              | 431                                | 13900 (7.2)                                        | (0.156, 0.043) <sup>f</sup> | this work |
| TDAF1 (N)                                                     | 2.5/8.8*/6.3*            | 5.3/- <sup>g</sup>   | 1.53/-                 | -/-                    | 408*                               | 13700* (11.6)                                      | (0.158, 0.041)              | 1         |
| TDAF2 (N)                                                     | 2.5/8.5*/6.0*            | 4.1/-                | 1.1/-                  | -/-                    | 408*                               | 7700* (10.8)                                       | (0.160, 0.044)              | 1         |
| TCPC-6 (N)                                                    | -/-/-                    | 3.72/-               | 1.35/-                 | -/-                    | -                                  | 398 (-)                                            | (0.16, 0.05)                | 2         |
| CPhBzIm (N)                                                   | 2.5/8.1/5.6              | 3/2.4                | 1.6/-                  | 1.07/0.5*              | 435*                               | 4600 (12.0)                                        | (0.16, 0.05)                | 3         |
| TPAXAN (N)                                                    | 3.4/-/-                  | 4.62/-               | -/-                    | -/-                    | 428                                | 900* (10.0)                                        | (0.155, 0.049)              | 4         |
| CzS2 (N)                                                      | 2.8/7.0*/4.2*            | 2.7/2.2              | 0.82/0.73              | 0.84/0.33              | 417                                | 2000* (9.7)                                        | (0.157, 0.044)              | 5         |
| TTP-TPI (N)                                                   | 3.1/5.7*/2.6*            | 5.02/3.98            | 2.1/1.47               | 1.88/0.81              | 424                                | 2000* (7.0)                                        | (0.16, 0.05)                | 6         |
| XBTPi (N)                                                     | 3.1/7.7/4.6              | 4.93/4.05            | 2.06/1.68              | 1.60/0.67              | 428                                | 1100* (8.0)                                        | (0.16, 0.05)                | 7         |
| SiPIM (N)                                                     | 4.2/10*/5.8*             | 6.29/2.8*            | 1.94/1.5*              | -/-                    | 420                                | 1950 (12.0)                                        | (0.163, 0.040)              | 8         |
| TPA-PIM (N)                                                   | -/-/-                    | 3.28/3.11            | 1.14/1.08              | 0.79/-                 | 420                                | 4510 (-)                                           | (0.161, 0.046)              | 9         |
| DPA-PIM (D)                                                   | 3.2/6.3*/3.1*            | 5.1/3.6              | 2.5/1.7                | -/-                    | 436                                | 9505 (10.0)                                        | (0.15, 0.05)                | 10        |
| TPA-S (N)                                                     | 3.0/7.8/4.8              | 1.76/-               | 0.47/0.42              | -0.17                  | 407*                               | 3000* (10.5)                                       | (0.158, 0.039)              | 11        |
| mTPA-PPI (N)                                                  | 3.2/-/-                  | 3.33/2.8*            | 0.84/0.7*              | 0.48/0.28*             | 404                                | 4065 (-)                                           | (0.161, 0.049)              | 12        |
| <sup>t</sup> Cbz-SO <sub>2</sub> -SPIRO- <sup>t</sup> Cbz (D) | 4.2/9.8*/5.6*            | 4.7/2.1*             | 1.8/0.8*               | 1.2/0.22*              | 420*                               | 1000* (9.8)                                        | (0.16, 0.04)                | 13        |
| TPA-TAZ (N)                                                   | 3.1/6.5*/3.4*            | 6.8/5.3              | 2.2*/1.8*              | -/-                    | 432*                               | 7323 (9.0)                                         | (0.158, 0.043)              | 14        |
| TPIBNCz (D)                                                   | 3.2/5.6*/2.4*            | 5.99/5.47            | 2.34/-                 | 2.14/-                 | 428                                | 1900* (6.5)                                        | (0.157, 0.048)              | 15        |
| DIP (N)                                                       | 3.2/7.2*/4.0*            | 3.27/2.6*            | 1.11/-                 | 0.89/-                 | 424                                | 2100* (9.0)                                        | (0.158, 0.040)              | 16        |
| Tmtp (N)                                                      | 3.3/7.5*/4.2*            | 3.0/2.9*             | 1.24/1.1*              | 1.14/-                 | 436                                | 4580 (9.4)                                         | (0.15, 0.04)                | 17        |
| TAZ-4Cz (N)                                                   | 3.9/9.9*/6.0*            | 2.48/1.1*            | 0.68/0.41*             | 0.58/0.15*             | 412                                | 1478 (11.0)                                        | (0.16, 0.04)                | 18        |
| PhImEn (N)                                                    | 3.3/7.0*/3.7*            | 2.5/2.4*             | 2.30/2.2*              | 1.32/1.0*              | 414                                | 11696 (14.0)                                       | (0.15, 0.05)                | 19        |
| TN4T-PCZ (D)                                                  | 4.2/7.6*/3.4*            | 20.4/19*             | 5.01/4.74              | 2.3*/1.9*              | 410*                               | 5377 (11.0)                                        | (0.16, 0.03)                | 20        |
| TPATZ (N)                                                     | 3.1/8.0*/4.9*            | 5.92/-               | 2.41/1.9*              | 2.20/0.78*             | 430                                | 4970 (10.4)                                        | (0.155, 0.047)              | 21        |
| BBPA (D)                                                      | 3.5/9.5*/6.0*            | 6.02/2.41            | -1.25                  | -0.41*                 | 412                                | 2300* (12.5)                                       | (0.15, 0.03)                | 22        |
| 1 (N)                                                         | 3.4/9.8*/6.4*            | 1.79/1.65*           | 0.36/0.31*             | 0.27/0.12*             | 410                                | 1326 (11.2)                                        | (0.16, 0.04)                | 23        |
| PImPI (N)                                                     | 3.2/7.5*/4.3*            | 6.83/4.25            | 2.21/-                 | 2.28/-                 | 416                                | 3362 (9.5)                                         | (0.16, 0.05)                | 24        |
| DFPBI (D)                                                     | 3.0/-/-                  | 4.96/-               | 1.62/-                 | -/-                    | 425                                | 270 (6.8)                                          | (0.157, 0.039)              | 25        |
| DFPBI (N)                                                     | 3.0/6.0*/3.0*            | 4.18/2.9*            | 1.48/1.0*              | 1.43/0.5*              | 435                                | 2690 (7.6)                                         | (0.154, 0.042)              | 25        |
| F-2CzB (N)                                                    | 3.2/5.8*/2.6*            | 4.43/3.5*            | -/-                    | -/-                    | 404                                | 2775 (9.5)                                         | (0.162, 0.028)              | 26        |
| 2FPPIcZ (N)                                                   | 3.0/5.2/2.2              | 4.3/2.5              | 1.8/1.1                | 1.7/0.7                | 425                                | 3835 (8.2)                                         | (0.160, 0.045)              | 27        |
| TPBPPI-PY (N)                                                 | 4.1/7.8*/3.7*            | 5.7/4.1*             | 1.8/1.4*               | 1.38/-                 | 420                                | 2300* (9.0)                                        | (0.16, 0.049)               | 28        |
| NPBI-PPI-TPA (N)                                              | 3.0/5.7*/2.7*            | 5.59/4.18            | 2.6/1.92               | 2.72/1.02              | 429                                | 3366 (8.2)                                         | (0.15, 0.05)                | 29        |



<sup>a</sup> N: Non-doped devices; D: Doped devices. <sup>b</sup> Operating voltage at the brightness of 1 cd/m<sup>2</sup> and 1000 cd/m<sup>2</sup>. <sup>c</sup> External quantum efficiency (EQE), current efficiency (CE) and power efficiency (PE): maximum value (left) and value at the luminance of 1000 cd/m<sup>2</sup>, respectively. <sup>d</sup> Maximum emission wavelength. <sup>e</sup> Maximum luminance and the corresponding voltage value. <sup>f</sup> Measured at the voltage of 5.0 V. <sup>g</sup> No valid information. \* Estimated values based on figures in the corresponding literatures.

65 7. Summary of areal energy loss from Joule heat of series resistance<sup>30, 31</sup>

| Table S3. Summary of areal energy loss from Joule heat of series resistance of the 7:1 doped C-OLED and other typical deep-blue OLEDs with $CIE_y \leq 0.05$ at about 1000 cd/m <sup>2</sup> |                                       |                                   |                                                |                                                       |                                                                        |                                                            |                |           |
|----------------------------------------------------------------------------------------------------------------------------------------------------------------------------------------------|---------------------------------------|-----------------------------------|------------------------------------------------|-------------------------------------------------------|------------------------------------------------------------------------|------------------------------------------------------------|----------------|-----------|
| Voltage (V)                                                                                                                                                                                  | Current density (mA/cm <sup>2</sup> ) | Input power (mW/cm <sup>2</sup> ) | Differential conductance (mS/cm <sup>2</sup> ) | Differential resistance (k $\Omega$ cm <sup>2</sup> ) | Energy loss from Joule heat of series resistance (mW/cm <sup>2</sup> ) | Energy loss from Joule heat of series resistance ratio (%) | CIE            | ref       |
| 4.1                                                                                                                                                                                          | 96.2                                  | 394.42                            | 177.5                                          | 0.00563                                               | 52.14                                                                  | 13.2                                                       | (0.158, 0.034) | This work |
| 5.5                                                                                                                                                                                          | 45.9                                  | 252.45                            | 44.9                                           | 0.0223                                                | 46.92                                                                  | 18.6                                                       | (0.157, 0.048) | 15        |
| 6.8                                                                                                                                                                                          | 55.5                                  | 377.40                            | 52.3                                           | 0.0191                                                | 58.90                                                                  | 15.6                                                       | (0.158, 0.043) | 14        |
| 7.5                                                                                                                                                                                          | 73.1                                  | 548.25                            | 61.6                                           | 0.0162                                                | 86.75                                                                  | 15.8                                                       | (0.16, 0.05)   | 24        |
| 6.5                                                                                                                                                                                          | 61.4                                  | 399.10                            | 58.3                                           | 0.0172                                                | 64.66                                                                  | 16.2                                                       | (0.15, 0.05)   | 10        |
| 7.8                                                                                                                                                                                          | 53.0                                  | 413.40                            | 38.4                                           | 0.0260                                                | 73.15                                                                  | 17.7                                                       | (0.155, 0.047) | 21        |

Note: The series resistance is derived from the differential conductance in Fig. 4b in this manuscript.

66  
67

## 68 8. References

- 69 1. C. C. Wu, Y. T. Lin, K. T. Wong, R. T. Chen and Y. Y. Chien, *Adv. Mater.*, 2004, **16**, 61-  
70 65.
- 71 2. S. Tang, M. R. Liu, P. Lu, H. Xia, M. Li, Z. Q. Xie, F. Z. Shen, C. Gu, H. P. Wang, B.  
72 Yang and Y. G. Ma, *Adv. Funct. Mater.*, 2007, **17**, 2869-2877.
- 73 3. W. Y. Hung, L. C. Chi, W. J. Chen, Y. M. Chen, S. H. Chou and K. T. Wong, *J. Mater.*  
74 *Chem.*, 2010, **20**, 10113-10119.
- 75 4. R. Kim, S. Lee, K. H. Kim, Y. J. Lee, S. K. Kwon, J. J. Kim and Y. H. Kim, *Chem.*  
76 *Commun.*, 2013, **49**, 4664-4666.
- 77 5. J. Ye, Z. Chen, M. K. Fung, C. J. Zheng, X. M. Ou, X. H. Zhang, Y. Yuan and C. S. Lee,  
78 *Chem. Mater.*, 2013, **25**, 2630-2637.
- 79 6. Y. Yuan, J. X. Chen, F. Lu, Q. X. Tong, Q. D. Yang, H. W. Mo, T. W. Ng, F. L. Wong,  
80 Z. Q. Guo, J. Ye, Z. Chen, X. H. Zhang and C. S. Lee, *Chem. Mater.*, 2013, **25**, 4957-  
81 4965.
- 82 7. W. C. Chen, Y. Yuan, G. F. Wu, H. X. Wei, L. Tang, Q. X. Tong, F. L. Wong and C. S.  
83 Lee, *Adv. Optical Mater.*, 2014, **2**, 626-631.
- 84 8. Z. Gao, G. Cheng, F. Z. Shen, S. T. Zhang, Y. N. Zhang, P. Lu and Y. G. Ma, *Laser*  
85 *Photonics Rev.*, 2014, **8**, L6-L10.
- 86 9. W. J. Li, L. Yao, H. C. Liu, Z. M. Wang, S. T. Zhang, R. Xiao, H. H. Zhang, P. Lu, B.  
87 Yang and Y. G. Ma, *J. Mater. Chem. C*, 2014, **2**, 4733-4736.
- 88 10. C. Y. He, H. Q. Guo, Q. M. Peng, S. Z. Dong and F. Li, *J. Mater. Chem. C*, 2015, **3**,  
89 9942-9947.
- 90 11. Y. C. Li, Z. H. Wang, X. L. Li, G. Z. Xie, D. C. Chen, Y. F. Wang, C. C. Lo, A. Lien, J.  
91 B. Peng, Y. Cao and S. J. Su, *Chem. Mater.*, 2015, **27**, 1100-1109.
- 92 12. H. C. Liu, Q. Bai, L. Yao, H. Y. Zhang, H. Xu, S. T. Zhang, W. J. Li, Y. Gao, J. Li, P. Lu,  
93 H. Y. Wang, B. Yang and Y. G. Ma, *Chem. Sci.*, 2015, **6**, 3797-3804.
- 94 13. C. Y. Chan, Y. C. Wong, M. Y. Chan, S. H. Cheung, S. K. So and V. W. W. Yam, *ACS*  
95 *Appl. Mater. Interfaces*, 2016, **8**, 24782-24792.
- 96 14. A. Obolda, Q. M. Peng, C. Y. He, T. Zhang, J. J. Ren, H. W. Ma, Z. G. Shuai and F. Li,  
97 *Adv. Mater.*, 2016, **28**, 4740-4746.
- 98 15. W. C. Chen, Y. Yuan, S. F. Ni, Q. X. Tong, F. L. Wong and C. S. Lee, *Chem. Sci.*, 2017,  
99 **8**, 3599-3608.
- 100 16. S. Jeong and J. I. Hong, *Dyes Pigments*, 2017, **144**, 9-16.
- 101 17. G. Li, J. W. Zhao, D. Zhang, J. J. Zhu, Z. C. Shi, S. L. Tao, F. Lu and Q. X. Tong, *New*

- 102 *J. Chem.*, 2017, **41**, 5191-5197.
- 103 18. H. X. Xu, P. Sun, K. X. Wang, J. Li, F. Wang, Y. Q. Miao, H. Wang, B. S. Xu and W. Y.  
104 Wong, *J. Mater. Chem. C*, 2017, **5**, 4455-4462.
- 105 19. S. Chen, J. R. Lian, W. G. Wang, Y. Jiang, X. D. Wang, S. M. Chen, P. J. Zeng and Z. C.  
106 Peng, *J. Mater. Chem. C*, 2018, **6**, 9363-9373.
- 107 20. X. Liang, H. B. Han, Z. P. Yan, L. Liu, Y. X. Zheng, H. Meng and W. Huang, *New J.*  
108 *Chem.*, 2018, **42**, 4317-4323.
- 109 21. J. J. Shi, Q. Ding, L. Xu, X. H. Lv, Z. W. Liu, Q. K. Sun, Y. Y. Pan, S. F. Xue and W. J.  
110 Yang, *J. Mater. Chem. C*, 2018, **6**, 11063-11070.
- 111 22. S. L. Wang, M. Y. Qiao, Z. H. Ye, D. H. Dou, M. Y. Chen, Y. Peng, Y. Shi, X. Y. Yang,  
112 L. Cui, J. Y. Li, C. J. Li, B. Wei and W. Y. Wong, *Iscience*, 2018, **9**, 532-541.
- 113 23. X. T. Feng, X. Z. Wei, M. N. Yin, Y. Q. Miao and P. Tao, *Tetrahedron Lett.*, 2019, **60**,  
114 151340-151343.
- 115 24. Z. Q. Li, C. L. Li, Y. C. Xu, N. Xie, X. C. Jiao and Y. Wang, *J. Phys. Chem. Lett.*, 2019,  
116 **10**, 842-847.
- 117 25. X. Qiu, S. Ying, C. Wang, M. Hanif, Y. W. Xu, Y. Li, R. Y. Zhao, D. H. Hu, D. G. Ma  
118 and Y. G. Ma, *J. Mater. Chem. C*, 2019, **7**, 592-600.
- 119 26. F. Huang, H. L. Liu, W. Sun, X. G. Li and S. R. Wang, *J. Mater. Chem. C*, 2020, **8**,  
120 9184-9188.
- 121 27. J. H. Xin, Z. Q. Li, Y. J. Liu, D. Liu, F. Zhu, Y. Wang and D. H. Yan, *J. Mater. Chem. C*,  
122 2020, **8**, 10185-10190.
- 123 28. J. J. Zhu, W. C. Chen, Y. Yuan, D. Luo, Z. L. Zhu, X. Chen, J. X. Chen, C. S. Lee and Q.  
124 X. Tong, *Dyes Pigments*, 2020, **173**, 107982.
- 125 29. J. J. Zhu, Y. W. Chen, Y. H. Xiao, X. Lian, G. X. Yang, S. S. Tang, D. G. Ma, Y. Wang  
126 and Q. X. Tong, *J. Mater. Chem. C*, 2020, **8**, 2975-2984.
- 127 30. S. M. Sze and K. K. Ng, *Physics of Semiconductor Devices*, Wiley InterScience, New  
128 Jersey, 2006.
- 129 31. S. J. Zhou and S. Liu, *Design and Manufacturing Technology of GaN-Based Light-*  
130 *Emitting Diodes (In Chinese)*, Science Press, Beijing, 2019.
- 131
